# Supplementary material for: HSD17B7 is required for Auditory Function by Regulating Cholesterol Synthesis in Sensory Hair Cells
Source: eLife journal article supplement (doi:10.7554/elife.108108), 2025-11-18
Supplement: fig2-figsupp2-data2 [file elife-108108-fig2-figsupp2-data2-v1.pdf]

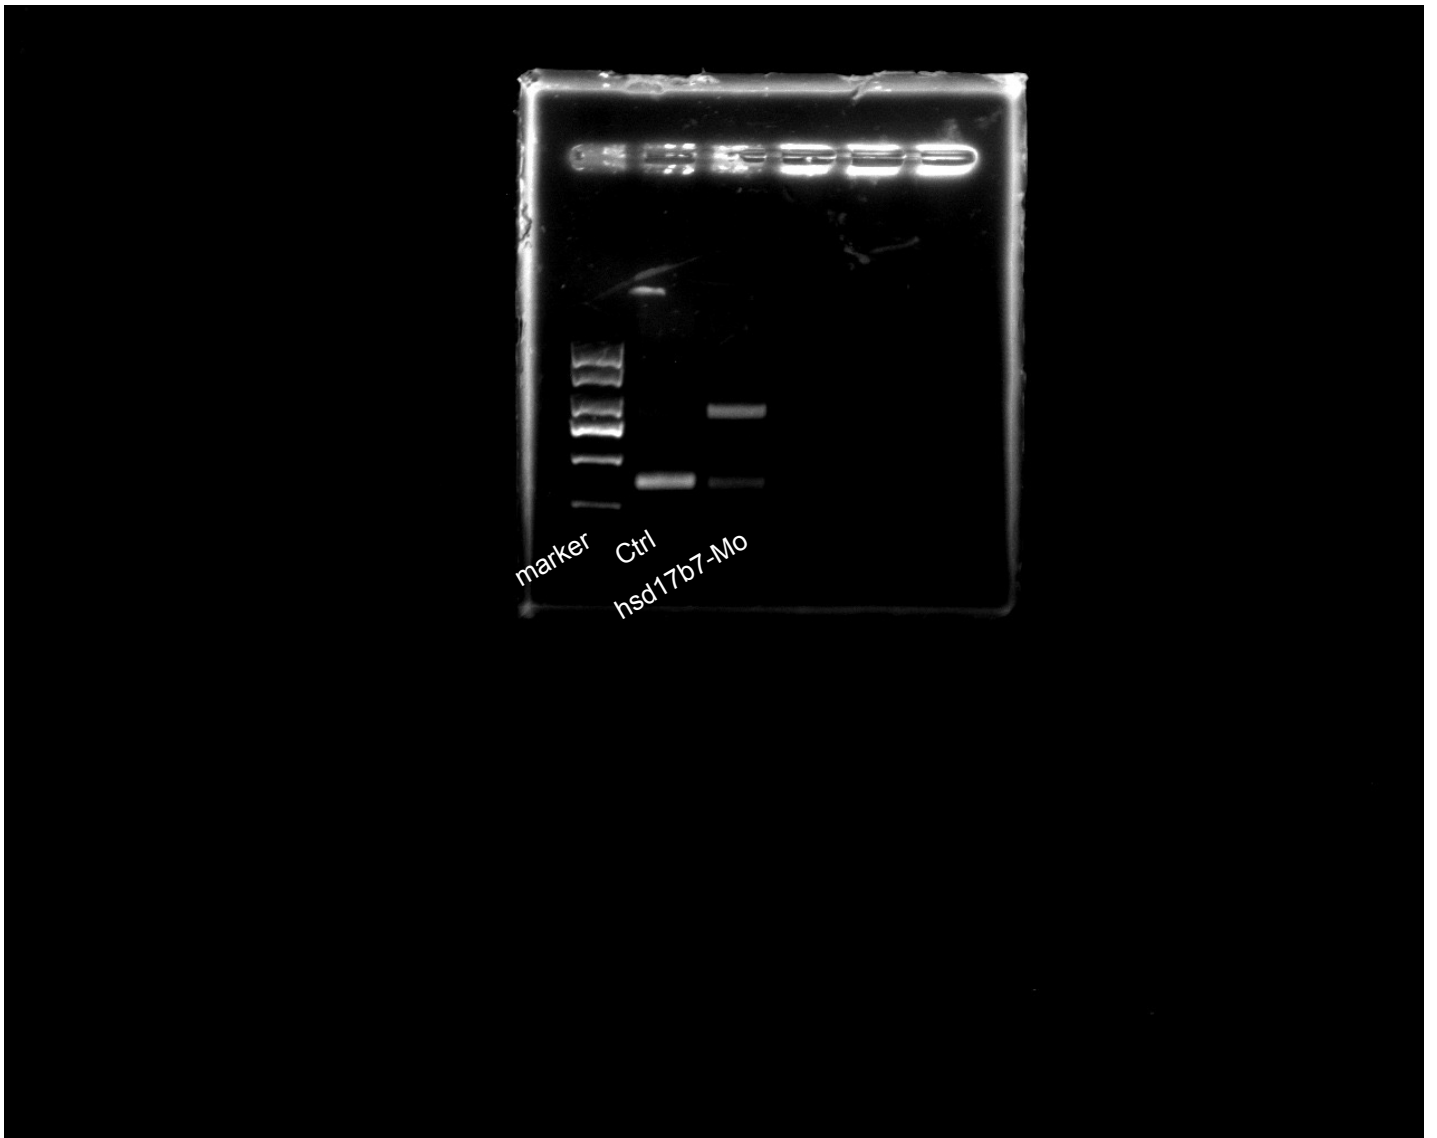

**Figure 2–figure supplement 2-source data 1.** Original membranes corresponding to Figure 2–figure supplement 2C. DNA markers were employed.
