# Supplementary material for: HSD17B7 is required for Auditory Function by Regulating Cholesterol Synthesis in Sensory Hair Cells
Source: eLife journal article supplement (doi:10.7554/elife.108108), 2025-11-18
Supplement: fig2-figsupp2-data4 [file elife-108108-fig2-figsupp2-data4-v1.pdf]

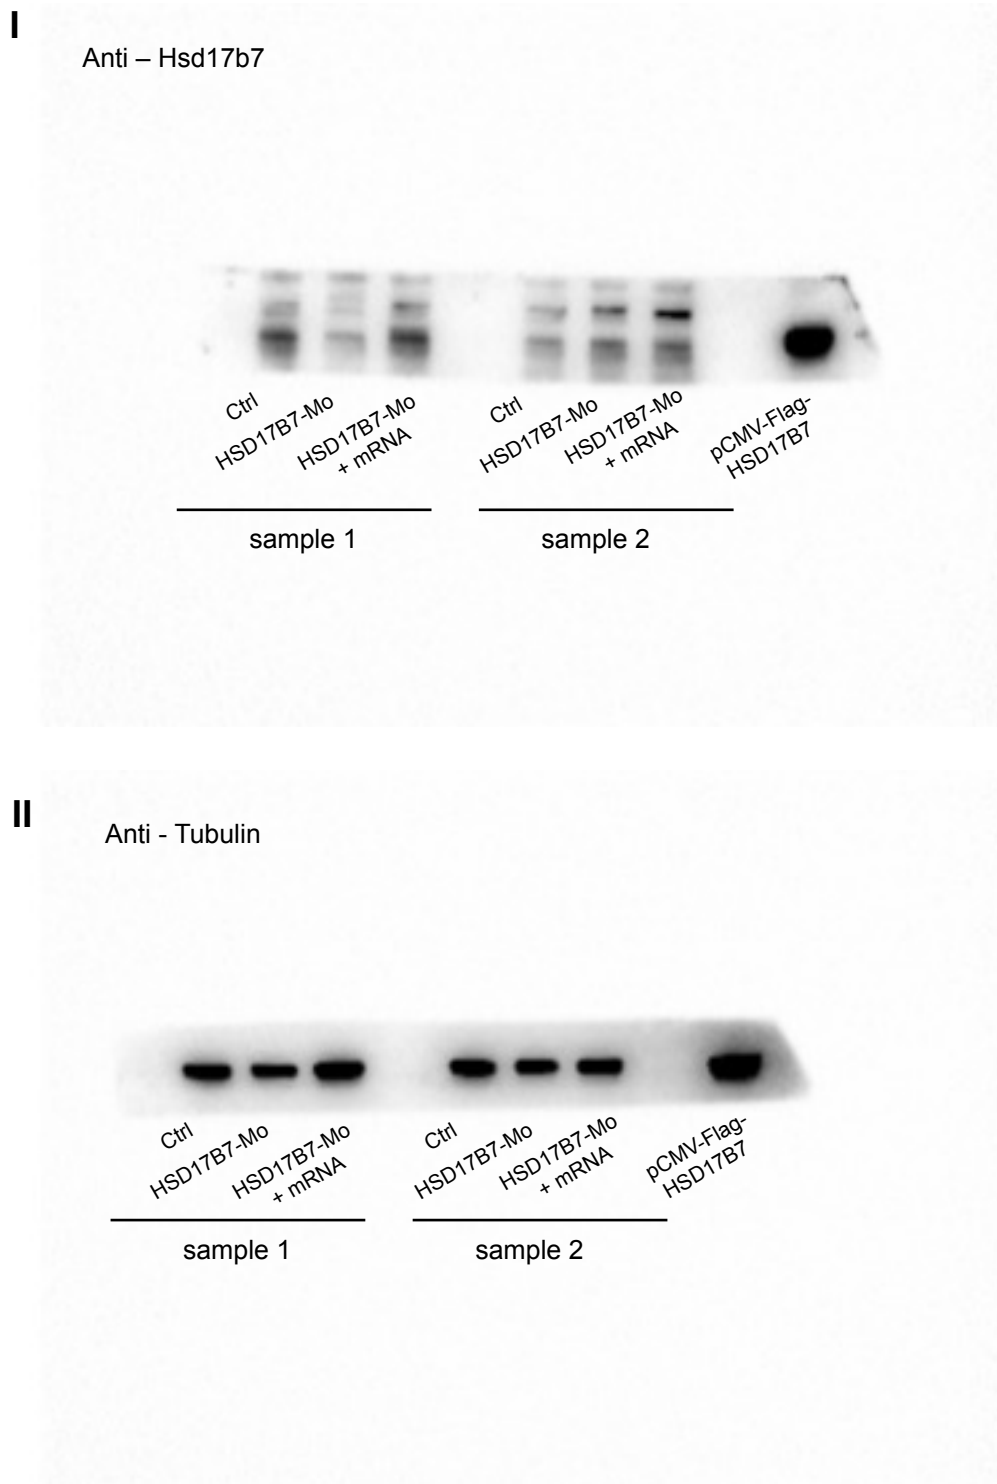

**Figure 2–figure supplement 2-source data 2.** Original membranes corresponding to **Figure 2–figure supplement 2D**. Lanes 1 and 5 represent the negative control group, lanes 2 and 6 represent the HSD17B7 MO-treated group, lanes 3 and 7 represent the HSD17B7 MO + mRNA treated group, lanes 4 and 8 were empty. Lane 9 was injected with the pCMV-Flag-HSD17B7 plasmid as a positive control. Rainbow molecular weight markers were employed. Panel I shows the detection results using the HSD17B7 antibody. Panel II shows the detection results using the tubulin antibody. Lanes 1, 2, and 3 are shown in Figure S4D of the article.
