# Supplementary material for: HSD17B7 is required for Auditory Function by Regulating Cholesterol Synthesis in Sensory Hair Cells
Source: eLife journal article supplement (doi:10.7554/elife.108108), 2025-11-18
Supplement: fig9-data2 [file elife-108108-fig9-data2-v1.pdf]

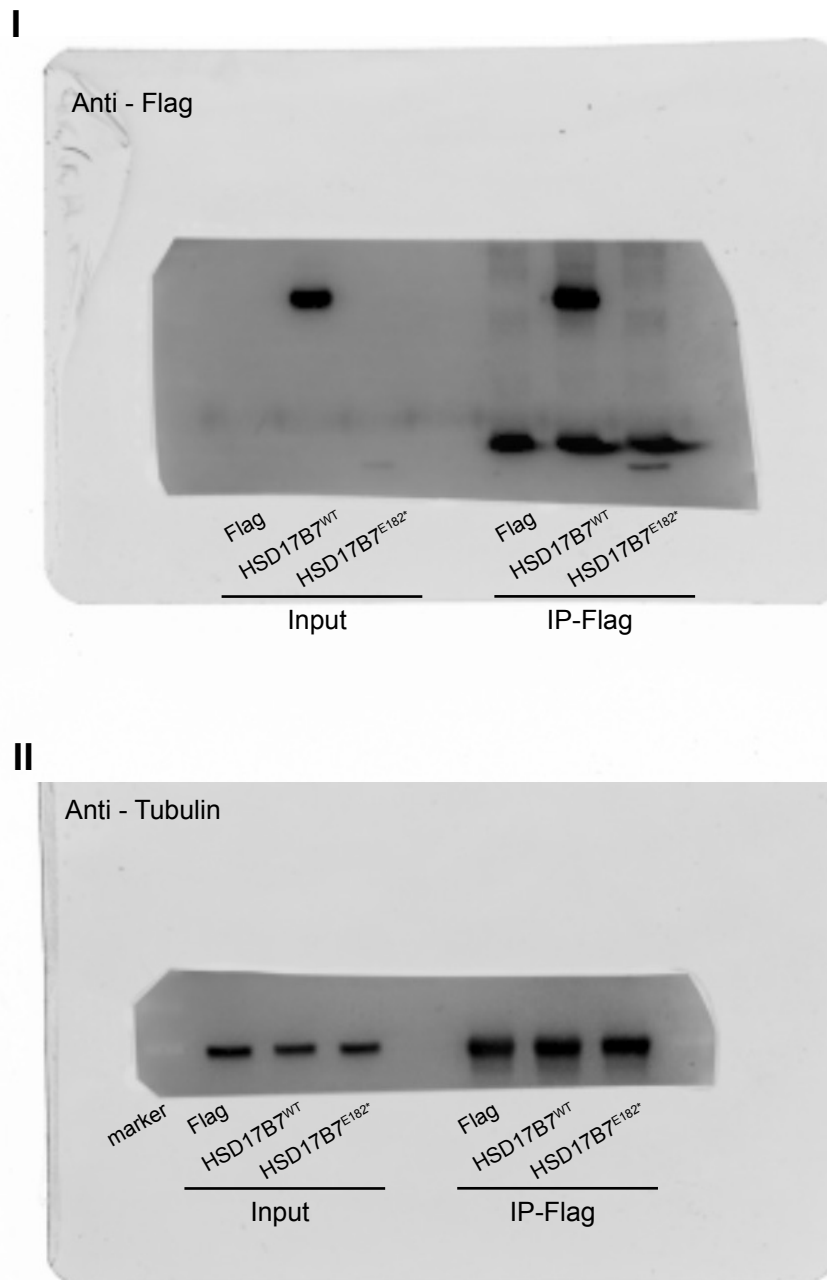

**Figure 9-source data 1.** Original membranes corresponding to Figure 9A. Rainbow molecular weight markers were employed. Panel I shows the detection results using the FLAG antibody, and marker shows the corresponding protein marker results. Panel II shows the detection results using the tubulin antibody, and marker shows the corresponding protein marker results.
