# Supplementary material for: HSD17B7 is required for Auditory Function by Regulating Cholesterol Synthesis in Sensory Hair Cells
Source: eLife journal article supplement (doi:10.7554/elife.108108), 2025-11-18
Supplement: fig9-data4 [file elife-108108-fig9-data4-v1.pdf]

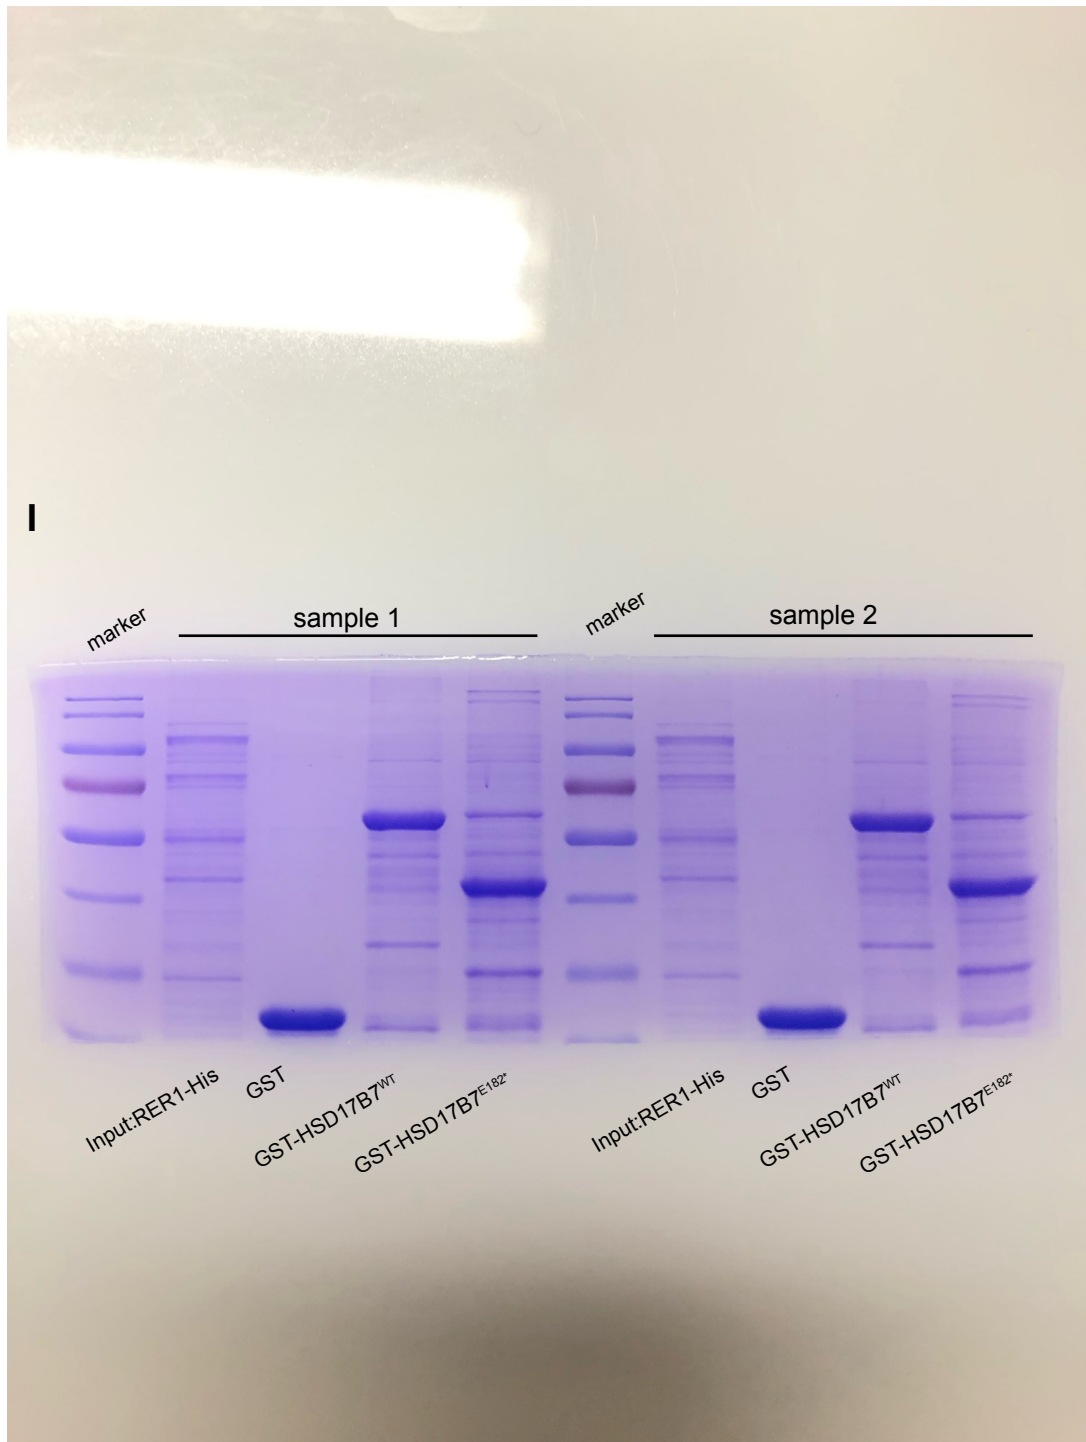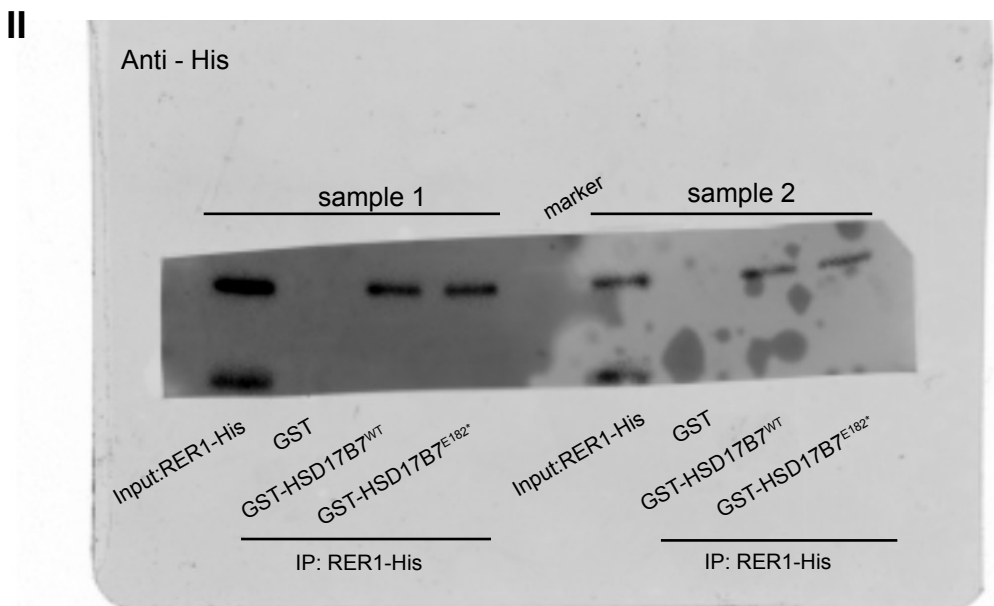

**Figure 9-source data 2.** Original membranes corresponding to Figure 9F. Rainbow molecular weight markers were employed. Panel I shows Coomassie blue staining of purified GST and GST-HSD17B7 proteins. Panel II shows the detection results using the His antibody, and I-marker shows the corresponding protein marker results.
